# **Beta bursting in the retrosplenial cortex is a neurophysiological correlate of environmental novelty which is disrupted in a mouse model of Alzheimer's disease.**

## ***Retrosplenial beta bursting in health and amyloidopathy***

Callum Walsh, Thomas Ridler, Maria Garcia Garrido, Jonathan Witton, Andrew D. Randall, Jonathan T. Brown

Institute of Biomedical and Clinical Sciences, University of Exeter Medical School, Hatherly Laboratories, Exeter EX4 4PS, United Kingdom

Corresponding Authors: C. Walsh, [cw685@exeter.ac.uk](mailto:cw685@exeter.ac.uk), J. T. Brown, [J.T.Brown@exeter.ac.uk](mailto:J.T.Brown@exeter.ac.uk)

Pages: 27

Figures: 6

Abstract: 221 words

Introduction: 646 words

Discussion: 1519 words

### **Conflict of Interest Statement**

The authors declare no competing financial interests.

### **Acknowledgements**

CFW was funded by a University of Exeter and Janssen Pharmaceutica studentship. TR was supported by an ARUK Major Project grant (ARUK-PG2017B-7) awarded to JTB and AR.

## 1 **Abstract**

2 The retrosplenial cortex (RSC) plays a significant role in spatial learning and memory, and is  
3 functionally disrupted in the early stages of Alzheimer's disease. In order to investigate  
4 neurophysiological correlates of spatial learning and memory in this region we employed *in vivo*  
5 electrophysiology in awake, behaving mice, comparing neural activity between wild-type and J20  
6 mice, a mouse model of Alzheimer's disease-associated amyloidopathy. To determine the response of  
7 the RSC to environmental novelty local field potentials were recorded while mice explored novel and  
8 familiar recording arenas. In familiar environments we detected short, phasic bursts of beta (20-30  
9 Hz) oscillations (beta bursts) which arose at a low but steady rate. Exposure to a novel environment  
10 rapidly initiated a dramatic increase in the rate, size and duration of beta bursts. Additionally, theta-  
11 beta cross-frequency coupling was significantly higher during novelty, and spiking of neurons in the  
12 RSC was significantly enhanced during beta bursts. Finally, aberrant beta bursting was seen in J20  
13 mice, including increased beta bursting during novelty and familiarity, yet a loss of coupling between  
14 beta bursts and spiking activity. These findings, support the concept that beta bursting may be  
15 responsible for the activation and reactivation of neuronal ensembles underpinning the formation and  
16 maintenance of cortical representations, and that disruptions to this activity in J20 mice may underlie  
17 cognitive impairments seen in these animals.

## 18 **Introduction**

19 The retrosplenial cortex (RSC) is considered to play a critical role in spatial learning and memory.  
20 Damage to this region results in severe impairments in navigation and landmark processing (see  
21 Mitchell *et al.*, 2018 for review). There is a large body of experimental evidence suggesting the  
22 retrosplenial cortex is involved in the encoding, retrieval and consolidation of spatial and contextual  
23 memory (see Todd and Bucci, 2015 for review). Optogenetic stimulation of RSC neurons is sufficient  
24 to elicit retrieval and consolidation of contextual memories (Cowansage *et al.*, 2014; De Sousa *et al.*,  
25 2019). RSC neurons encode a range of contextual information during navigation (Koike *et al.*, 2017),

26 and inactivation of the RSC during impairs performance in spatial memory and contextual fear  
27 memory tasks (Czajkowski et al., 2014; Kwapis et al., 2015), suggesting the RSC is involved in the  
28 storage of spatial information. Finally, Iaria *et al.*, (2007) demonstrated that while hippocampal  
29 subregions are differentially involved in the encoding and retrieval of spatial information, the entire  
30 RSC is active during both processes. Spatial learning and memory impairments have been shown to  
31 be one of the earliest aspects of cognitive impairment in Alzheimer's disease (AD). Patients exhibit  
32 disturbances in specific spatial memory processes associated with the RSC (Laczó et al., 2009; Vann et  
33 al., 2009; Morganti et al., 2013). During the early stages of AD, the retrosplenial gyrus has been shown  
34 to exhibit regional hypometabolism (as measured by FDG-PET), and considerable atrophy (Minoshima  
35 et al., 1997; Choo et al., 2010). As such, the RSC is a region of great interest in research into the brain's  
36 function in health and AD.

37 Measurable correlates of brain function can have great value in fundamental neuroscience. They can  
38 aid the understanding of the complex ways in which the brain processes information and performs its  
39 many tasks, and also indicate how such functionality may be affected in disease. Similarly, these  
40 "functional biomarkers" can provide measurable benchmarks against which to test interventions  
41 which may affect or restore normal brain function (Walsh et al., 2017). Of the growing number of  
42 methodologies available for investigating brain function, *in vivo* electrophysiology remains a powerful  
43 tool with a superior temporal resolution to all others. The coordinated firing of large groups of neurons  
44 in the brain gives rise to waves of electrical activity, known as neural oscillations, which can be  
45 recorded as intracranial local field potentials (LFPs) or extracranial electroencephalograms (EEGs). It  
46 is thought that one of the roles of these oscillations in the brain is to coordinate the spiking activity of  
47 neurons, allowing computation and communication between potentially distant brain regions  
48 (Canolty et al., 2010). The temporal resolution of electrophysiology combined with the spatial  
49 specificity afforded by intracranial recordings make *in vivo* electrophysiology an invaluable tool for  
50 discovering functional correlates of brain function and disease-associated dysfunction.

51 In order to investigate the function of the RSC in spatial learning and memory, we recorded LFPs and  
52 multi-unit spiking activity from this region, while mice freely explored either a novel or familiar  
53 environment. To probe the effects of AD-associated amyloid pathology on RSC function we used J20  
54 mice, a widely employed mouse model of amyloidopathy. In this manuscript, we describe short, phasic  
55 bursts of beta (20-30 Hz) oscillations, termed “beta bursts”, that occur within the RSC, while mice  
56 freely explore an environment. Beta bursting activity is significantly increased during exposure to a  
57 novel environment, and these bursts are correlated with increased neuronal spiking in the RSC. These  
58 data demonstrate that beta bursting in the RSC is a robust neurophysiological correlate of  
59 environmental novelty and may have a role in the storage and retrieval of cortical spatial  
60 representations. Finally, we observed aberrant beta bursting activity and an uncoupling of beta  
61 bursting from neuronal spiking in the RSC in J20 mice, which may disrupt its function, and underlie  
62 spatial learning and memory deficits seen in these mice (Cheng et al., 2007).

## 63 **Methods**

### 64 **Ethics**

65 All procedures were carried out in accordance with the UK Animal (Scientific Procedures) Act 1986  
66 and were approved by the University of Exeter Animal Welfare and Ethical Review Body.

### 67 **Animals**

68 8 male J20 mice and 6 wild-type littermates were bred at the University of Exeter and housed on a 12  
69 hour light/dark cycle. Access to food and water was provided ad libitum. All mice underwent surgery  
70 at between 6-8 months of age. Mice were group housed prior to surgery, and single housed post-  
71 surgery, in order to prevent damage to the surgical implants.

### 72 **Surgery**

73 Mice were unilaterally implanted with a 16 channel, single shank silicon probe (NeuroNexus  
74 Technologies, A1x16-5mm-100-177-CM16LP), in the right retrosplenial cortex (AP -2 mm, ML +0.5  
75 mm, DV +1.75 mm, 0° Pitch). Mice were anaesthetised using isoflurane and fixed into a stereotaxic  
76 frame. A small craniotomy was drilled over the desired co-ordinate, and at least one hole was drilled  
77 in each of the major skull plates, in which miniature screws were placed to act as supports (Antrin  
78 Miniature Specialties). The probe was slowly lowered into the desired location, and fixed in place with  
79 dental cement (RelyX Unicem, 3M). The ground wire from the probe was connected to a silver wire,  
80 attached to a screw overlying the cerebellum. Throughout surgery, body temperature was monitored  
81 with a rectal probe and regulated by a feedback-controlled heat mat. Animals were kept hydrated by  
82 subcutaneous injections of Hartmann's solution once per hour of surgery (0.01 ml/g body weight).

### 83 **Behaviour**

84 After at least one week of post-surgical recovery, animals underwent a Novel/Familiar environment  
85 task, as shown in (Fig. 1). Individual mice were tethered to the recording apparatus, and placed in one  
86 of two high-sided recording arenas: one square, with black and white stripes, and one circular and  
87 lacking stripes. Both arenas each had two internal visual cues, placed on opposite sides. The animals  
88 were allowed to freely explore their environment for 15 minutes, after which, they were returned to  
89 their home cage. After 15 minutes in their home cage, the animal was returned to the same recording  
90 arena for another 15 minutes, and allowed to freely explore. Following this, the animal was returned  
91 to its home cage. This protocol was repeated at the same time of day, for 5 consecutive days, but on  
92 the fifth day, the animal was placed in the other, previously unseen arena. The order of exposure to  
93 these arenas was counterbalanced between animals. Each session can therefore be described by the  
94 experimental day, and the particular session within that day, with session A being the first, and session  
95 B being the second. Using this nomenclature, Sessions 1a and 5a were 'novel' sessions, while the  
96 remaining sessions were 'familiar' sessions. In order to reduce the stress associated with the recording  
97 process, animals were acclimatised to this process during a 10 minute test session 3 days prior to the

98 start of the experiment, in which the animal was tethered and recorded from while in its home cage.  
99 An added benefit of this was to familiarize the animals with this experimental procedure, thus  
100 ensuring that perceived novelty during the first experimental session was limited to the environment,  
101 and not the experience of being tethered to the recording apparatus.

## 102 **Data Collection**

103 Throughout experimental sessions, Local Field Potentials (LFPs) were recorded using an Open Ephys  
104 Acquisition board (Open Ephys), which was tethered to the probe via a headstage (RHD 16-Channel  
105 Recording Headstage, Intan Technologies), and SPI cables (Intan Technologies). LFPs on each channel  
106 were sampled at 30 kHz, while the animal's location was monitored using a pair of light-emitting  
107 diodes (LED) soldered to the headstage, and a video camera, placed directly above the arena. The  
108 location of these LEDs was tracked using Bonsai tracking software, so the location and running speed  
109 of the animal could be estimated offline.

## 110 **Data Analysis**

111 LFPs were down-sampled (Spectral Analysis: 1 kHz, Burst Detection and Phase Amplitude Coupling: 3  
112 kHz, Multi-Unit Activity: N/A) and de-trended, in order to remove any slow linear drift of the baseline  
113 that may occur across the session. The Chronux toolbox (Mitra and Bokil, 2008, <http://chronux.org/>)  
114 was used for the mtspecgramc function, as well as a number of built in MATLAB functions. All scripts  
115 used in this study were written in house, and are now publicly available (see Software Accessibility).  
116 All LFP analyses were performed for a single channel in the dysgranular and a separate single channel  
117 in granular RSC, except for multi-unit activity analysis, in which all channels in each region were used.  
118 The location of each channel was estimated from post-hoc histology.

## 119 **Power Spectra**

120 Multi-taper spectral analysis was performed using the mtspecgramc function from the Chronux  
121 Toolbox, with a time-bandwidth product of 2 (1 second x 2 Hz), and 3 tapers, resulting in some

122 smoothing of resulting spectra. The `mtspecgramc` function generates a power spectrogram by  
123 generating multiple power spectra for short segments of time series data, using a moving window; in  
124 our case with the window size of 1 s with no overlap. These spectrograms were then logged to the  
125 base 10, and multiplied by 10, in order to correct for the tendency of spectral power to decrease with  
126 a  $1/f$  distribution. These individual spectra were averaged, resulting in a single mean power spectrum  
127 for the entire session, or for the first minute of each session, as specified in the results. Spectral data  
128 from 48 to 52 Hz, which incorporates line frequency noise (50 Hz), were removed, and linearly  
129 interpolated. The power of each frequency band was calculated as the mean power in each of the  
130 following frequency ranges: delta (1-5 Hz), theta (5-12 Hz), alpha (12-20 Hz), beta (20-30 Hz), low  
131 gamma (30-65 Hz), and high gamma (65-120 Hz).

### 132 **Beta Burst Detection**

133 The data were band-pass filtered between 20-30 Hz, to isolate the beta frequency band. The  
134 amplitude and phase of this beta signal were calculated as the real and imaginary components of the  
135 Hilbert transform, respectively. The amplitude was z-scored, in order to give the instantaneous  
136 standard deviation of the beta signal amplitude from the mean. Epochs of the signal where this z-  
137 score exceeded 2 standard deviations from the mean amplitude were detected, as were the  
138 corresponding “edges” of these epochs, where the signal magnitude surpassed 1 standard deviation  
139 either side of the 2 standard deviation threshold. This was done in order to capture the time-course  
140 of these high beta amplitude epochs. Events that did not persist longer than a minimum duration of  
141 150 ms (i.e. fewer than 3 oscillation cycles) were discarded. Furthermore, due to the sensitivity of this  
142 method to large, amplitude noise artefacts, any event whose peak amplitude exceeded three scaled  
143 median absolute deviations from the median of the events detected in that session were discarded as  
144 well. These remaining events were then considered beta-bursts. The duration and peak magnitude of  
145 each burst was calculated, as well as the distribution and total number of bursts in the session.

### 146 **Phase-Amplitude Coupling**

147 To calculate phase-amplitude coupling, and create a comodulogram, modulation index was calculated  
148 individually for each pair of phase and amplitude frequencies. Modulation index was calculated as  
149 described by Canolty *et al.* (2006), with modification and vectorisation of some of the MATLAB code,  
150 for phase frequencies in bins of 0.25 Hz from 2 to 12 Hz, and for amplitude frequencies in bins of 2 Hz  
151 from 10 to 100 Hz. For each pair, local field potentials were filtered in the phase frequency band and  
152 the amplitude frequency band, after which the instantaneous phase and amplitude of each filtered  
153 signal was calculated, respectively, using the Hilbert transform. Subsequently, modulation index (MI)  
154 was calculated, but in order to attempt to reduce the possibility of spurious coupling, this was  
155 normalised through the use of 10 surrogates, created by time shifting the data by a random amount  
156 (between 1 and 59 seconds). In order to smooth the resulting comodulograms, the data matrix was  
157 linearly interpolated in both dimensions by a factor of 2.

## 158 **Multi-Unit Activity**

159 Due to the distance between adjacent channels on the recording probe (100  $\mu\text{m}$ ) it is highly unlikely  
160 that activity of a single neuron would appear on multiple channels. Consequently, each channel was  
161 treated as an individual multi-unit. Raw local field potentials were first common average-referenced,  
162 using a mean of the signals from all other 15 channels, then filtered in the range of 500-14250 Hz, in  
163 order to isolate the spiking frequency band. Spikes were detected as peaks that crossed a threshold  
164 given by the median of the absolute voltage values of the signal, multiplied by 0.6745, as suggested  
165 by Quiroga, Nadasdy and Ben-Shaul (2004), and had a minimum separation of 0.5 ms. In order to  
166 investigate multi-unit activity during beta bursts, bursts were detected as previously mentioned, and  
167 bursts that occurred within a second of each other were discarded, to remove overlapping segments.  
168 A single peri-burst histogram was created for each channel by taking the total number of spikes in 20  
169 ms time bins from 1 second before burst onset, to 1 second after, for all beta bursts. Each histogram  
170 was then normalised by dividing the count in each bin by the total number of spikes in all bins,



171 averaged across all channels within the region, and then across all sessions, smoothed with a 100 ms  
172 moving mean filter, and z-scored with respect to the baseline epoch (1 second pre-burst).

### 173 **Software Accessibility**

174 All code has been made publicly available at <https://github.com/cfle/In-Vivo-Ephys-Code>. This code is  
175 freely accessible for viewing, or use. If using any of this code in a paper, please, cite this paper as well  
176 as the GitHub repository (<https://github.com/cfle/In-Vivo-Ephys-Code>).

### 177 **Statistics**

178 All statistical analysis was performed in MATLAB. Fourteen mice in total were used in this study, 6  
179 wild-type and 8 J20, with each mouse undergoing a total of ten recording sessions (5 days, 2 sessions  
180 per day). Unfortunately, the local field potential data from Day 3 session 1 (i.e. session 3a) was  
181 corrupted for a single wild-type mouse, and therefore data for this mouse from this session was  
182 omitted from all figure making and statistics. Therefore the n numbers for all statistics are (wild-type:  
183 n = 6 (except from Day3a where n = 5), J20: n = 8). All statistics, unless stated otherwise, were  
184 performed using a two-way ANOVA, with genotype (wild-type/J20) and novelty (novel/familiar) as  
185 factors. It is important to note that due to the experimental design of our Novel/Familiar environment  
186 task, there were multiple novel and familiar sessions (2 novel, and 8 familiar). All sessions were either  
187 classified as novel or familiar and analysed accordingly. Following a significant main effect or  
188 interaction, Bonferroni-corrected multiple comparisons was performed, to investigate pairwise  
189 differences between different levels of either factor.

### 190 **Histology**

191 Upon completion of the experiments, mice were killed using an overdose of sodium pentobarbital  
192 (Euthetal), and an isolated stimulator was used to produce electrolytic lesions at the recording sites.  
193 Mice were then transcardially perfused with 40% paraformaldehyde (PFA), and their brains were  
194 extracted and stored in PFA for 24 hours, after which they were transferred to phosphate-buffered

195 saline (PBS) prior to sectioning. Brains were sliced into 100  $\mu$ m sagittal sections using a vibratome  
196 (Leica), and stained with Cresyl Violet. Digital pictures were taken using QCapture Pro 7 software  
197 (Qimaging), and electrode sites were verified by comparing the lesion sites in these photographs to  
198 The Allen Mouse Brain Atlas (<https://mouse.brain-map.org/static/atlas>). Due to the high channel  
199 count of these probes, as well as their linear geometry, it was possible to account for small differences  
200 in the depth of each probe by selecting channels of similar depths across different probes. This  
201 resulted in reduced variability between animals in a range of neurophysiological measures.

## 202 **Results**

203 To investigate neurophysiological correlates of spatial learning and memory in the retrosplenial cortex  
204 (RSC), local field potentials were recorded from across the entire dorsoventral axis of the RSC, while  
205 animals underwent a novel/familiar environment task. The RSC is made up of two distinct subdivisions:  
206 dysgranular (RSCdg), and granular (RSCg). While these regions are strongly interconnected, the  
207 neuroanatomical connectivity of these regions has been shown to differ (van Groen and Wyss, 1992;  
208 Van Groen and Wyss, 2003a, 2003b), therefore it is possible that the functional neurophysiology may  
209 vary as well, especially during a behavioural paradigm such as this, where spatial learning and memory  
210 processes may be stimulated. Due to the anatomical positioning of these subdivisions in rodents, it is  
211 possible to record from both RSCdg and RSCg at once, using a single, vertical silicon probe (Figure 1C).  
212 Therefore for this study, our analyses were performed for both subdivisions. We found very little  
213 difference between the electrophysiological activities seen in the two subregions. Furthermore, any  
214 changes seen in J20 mice were generally common to both subregions, with marginally greater effects  
215 in RSCg. For the sake of conciseness, we have decided to only show the data from RSCg in this paper.

## 216 **Spectral Analysis**

217 Local field potentials from RSCg show a clear peak in theta frequency band (5-12 Hz) throughout  
218 recording sessions (Fig. 2a). In order to investigate any changes in oscillatory activity in RSCg during

219 environmental novelty, power spectral analysis was performed on the entire 15 minutes of each  
220 session. These power spectra were averaged across novel and familiar sessions for wild-type and J20  
221 mice. Beta and low gamma power were significantly higher overall during novel sessions (Main Effect  
222 Novelty - Beta:  $F(1,135) = 16.4, p = 8.8e-5$ ; Low Gamma:  $F(1,135) = 10.8, p = 0.001$ , 2-way ANOVA).  
223 Furthermore, while alpha, beta, low gamma and high gamma power were significantly higher overall  
224 in J20 mice (Main Effect Genotype – Alpha:  $F(1,135) = 21.4, p = 8.46e-6$ ; Beta:  $F(1,135) = 253, p = 1.01e-$   
225  $32$ ; Low Gamma:  $F(1,135) = 43.3, p = 9.56e-10$ ; High Gamma:  $F(1,135) = 14.4, p = 2.3e-4$ , 2-way  
226 ANOVA), delta and theta power were significantly lower (Main Effect Genotype - Delta:  $F(1,135) =$   
227  $9.23, p = 0.03$ ; Theta:  $F(1,135) = 7.92, p = 0.006$ , 2-way ANOVA). Beta power was significantly higher  
228 during novel sessions in J20 (Nov:  $17.7 \pm 0.18$ ; Fam:  $16.9 \pm 0.09$ ;  $p = 4.7e-4$ ) but not wild-type mice  
229 (Nov:  $15.1 \pm 0.21$ ; Fam:  $14.7 \pm 0.1$ ;  $p = 0.4$ ). Upon closer inspection of power spectrograms (Fig. 2a), it  
230 was clear that spectral activity changed within novel sessions. Power in the alpha, beta and low gamma  
231 range appeared to be higher in the first minute of the session and diminish over time. As exemplified  
232 in (Fig. 2c), transient epochs of high power in the 12-40 Hz range are seen throughout the early stages  
233 of the session. By performing the same power spectral analysis as before on only the first minute of  
234 each session, clear differences appeared between novel and familiar sessions. Alpha, beta and low  
235 gamma power were significantly higher overall during novel sessions (Main Effect Novelty - Alpha:  
236  $F(1,135) = 5.73, p = 0.02$ ; Beta:  $F(1,135) = 75.7, p = 1.01e-14$ ; Low Gamma:  $F(1,135) = 35.6, p = 1.98e-$   
237  $8$ , 2-way ANOVA). Furthermore, alpha, beta, low gamma and high gamma power were significantly  
238 higher overall in J20 mice (Main Effect Genotype - Alpha:  $F(1,135) = 40.9, p = 2.47e-9$ ; Beta:  $F(1,135)$   
239  $= 132, p = 1.1e-21$ ; Low Gamma:  $F(1,135) = 14.1, p = 2.52e-4$ ; High Gamma:  $F(1,135) = 12.9, p = 4.65e-$   
240  $4$ , 2-way ANOVA). Beta and low gamma power were significantly higher in wild type (Beta: Nov:  $17 \pm$   
241  $0.28$ ; Fam:  $15 \pm 0.14$ ;  $p = 5.47e-8$ ; Low Gamma: Nov:  $14.6 \pm 0.26$ ; Fam:  $13.2 \pm 0.13$ ;  $p = 3.62e-5$ ) and  
242 J20 mice (Beta: Nov:  $19.2 \pm 0.25$ ; Fam:  $17.5 \pm 0.12$ ;  $p = 3.59e-8$ ; Low Gamma: Nov:  $15.1 \pm 0.23$ ; Fam:  
243  $14.2 \pm 0.11$ ;  $p = 0.002$ ).

244 Across these time series, increased beta power occurred in brief, discrete epochs, as shown in the  
245 expanded power spectrogram in (Fig. 3a). This can also be seen clearly in beta-filtered local field  
246 potentials, where these periods of high beta amplitude intersperse an otherwise very low amplitude  
247 oscillation. In order to understand the timescale and frequency domains of these events, wavelet  
248 analysis was used to investigate them further. As exemplified in (Fig. 3C), these individual events were  
249 short in duration, and peaked in the 20-30 Hz, beta band.

## 250 **Beta Bursting Activity**

251 In order to investigate this phasic beta activity in more depth, an algorithm was written to detect and  
252 analyse these “beta bursts”; the basis of this algorithm is illustrated in (Fig. 4a). Once all putative bursts  
253 have been detected, the duration and magnitude of these beta bursts was calculated (Fig. 4a). With  
254 these transient epochs of high beta power now classified as discrete beta bursts, it is possible to  
255 compare this beta activity between sessions. Overall, there were significantly more beta bursts  
256 detected during novel sessions compared to familiar sessions (Main Effect Novelty -  $F(1,135) = 74$ ,  $p =$   
257  $1.73e-14$ , 2-way ANOVA). As shown in (Fig. 4b), there were significantly more beta bursts detected  
258 during novelty, for wild-type (Nov:  $33.7 \pm 2.42$ ; Fam:  $21.4 \pm 1.22$ ;  $p = 7.59e-5$ ) and J20 mice (Nov:  $56.3$   
259  $\pm 2.1$ ; Fam:  $37.8 \pm 1.05$ ;  $p = 4.83e-12$ ). Furthermore, on average the number of beta bursts detected  
260 was significantly higher in J20 mice (Main Effect Genotype –  $F(1,135) = 118$ ,  $p = 3.45e-20$ , 2-way  
261 ANOVA). Furthermore, it is possible to investigate the distribution of beta bursts within sessions. As  
262 shown in (Fig. 4c), during familiar sessions the rate of beta bursting was reasonably steady, as indicated  
263 by the linear relationship between time and burst number shown in the cumulative frequency plot,  
264 for both wild-type and J20 mice. During novel sessions, however, there was a high rate of beta bursting  
265 during the first 1-3 minutes of the session, which gradually decreased over time to a steady rate. The  
266 rate of beta bursting was significantly higher in J20 mice during familiar sessions, and during the initial  
267 and final part of novel sessions.

268 The features of these beta bursts may also vary depending on novelty and genotype. Burst magnitude  
269 was significantly higher overall during novel sessions (Main Effect Novelty -  $F(1,135) = 48.7$ ,  $p = 1.21e-10$ , 2-way ANOVA). Furthermore, burst magnitude was significantly higher overall in J20 mice (Main  
270 Effect Genotype -  $F(1,135) = 137$ ,  $p = 2.97e-22$ , 2-way ANOVA). As shown in (Fig, 4d), beta bursts were  
271 significantly larger in magnitude during novelty, for both wild-type (Nov:  $106 \pm 2.96$ ; Fam:  $90.4 \pm 1.5$ ;  
272  $p = 2.88e-5$ ) and J20 mice (Nov:  $131 \pm 2.57$ ; Fam:  $117 \pm 1.28$ ;  $p = 5.16e-6$ ). There was also a significant  
273 interaction between the effects of genotype and novelty on beta burst duration ( $F(1,135) = 8.04$ ,  $p =$   
274  $0.005$ , 2-way ANOVA). As shown in (Fig.4e), beta bursts were significantly longer in duration during  
275 novel sessions for both wild-type (Nov:  $192 \pm 2.1$ ; Fam:  $176 \pm 1.1$ ;  $p = 3.32e-9$ ) and J20 mice (Nov:  $189$   
276  $\pm 1.8$ ; Fam:  $182 \pm 0.9$ ;  $p = 0.005$ ).

## 278 **Phase-amplitude Coupling**

279 As elegantly shown by van Ede *et al.* (2018), continuous oscillations may appear as phasic burst events  
280 if their amplitude varies greatly over time. The amplitude of high frequency oscillations such as gamma  
281 may be modulated by the phase of low frequency oscillations such as theta (Canolty *et al.*, 2006). This  
282 interaction is generally thought to allow slow, large amplitude oscillations to coordinate faster, small  
283 amplitude local oscillations. For this reason, it was of interest for us to investigate whether the  
284 amplitude of beta oscillations was coupled to the phase of theta oscillations, an increase in which may  
285 underlie the increased beta bursting activity seen during novelty. As shown in (Fig. 5a), phase-  
286 amplitude coupling efficacy was calculated for a range of phase and amplitude frequencies, and the  
287 effect of novelty and genotype determined. The strength of phase-amplitude coupling was quantified  
288 for theta-alpha, theta-beta and theta-gamma coupling for each session (Fig. 5b). There were  
289 significant interactions between the effects of genotype and novelty for theta-alpha coupling ( $F(1,135)$   
290  $= 12.8$ ,  $p = 4.72e-4$ ) and theta-beta coupling ( $F(1,135) = 17.7$ ,  $p = 4.73e-5$ , 2-way ANOVA). Theta-alpha  
291 coupling was significantly higher in novel sessions for wild-type (Nov:  $2.59 \pm 0.15$ ; Fam:  $1.6 \pm 0.07$ ;  $p =$   
292  $2.4e-7$ ) but not J20 mice (Nov:  $2.2 \pm 0.13$ ; Fam:  $1.98 \pm 0.06$ ;  $p = 1$ ). Theta-beta coupling was also

293 significantly higher in novel sessions for wild-type (Nov:  $1.65 \pm 0.08$ ; Fam:  $1.16 \pm 0.04$ ;  $p = 1.04e-6$ ) but  
294 not J20 mice (Nov:  $1.23 \pm 0.07$ ; Fam:  $1.23 \pm 0.03$ ;  $p = 1$ ). There were no significant effects of novelty  
295 on theta-gamma coupling, but theta-gamma coupling was lower on average, in J20 mice (Main Effect  
296 Genotype –  $F(1,135) = 19.7$ ,  $p = 1.87e-5$ ). It is important to note that in order to focus on the most  
297 physiologically and behaviourally relevant part of the session, this analysis was performed for the first  
298 minute of each session. When the same analysis was performed on the last minute of each session,  
299 there was no effect of novelty on coupling in any band for either genotype (data not shown).

### 300 **Spiking Activity**

301 In order to determine whether beta bursting was associated with a change in neuronal firing, multi-  
302 unit activity was investigated. Due to the linear geometry of the silicon probes, and the 100  $\mu\text{m}$   
303 distance between channels, it was not possible to reliably identify single unit activity, as activity from  
304 a single neuron was unlikely to appear on multiple channels, limiting spatiotemporal clustering  
305 methods such as those enabled by tetrodes or higher density silicon probes. Therefore, spikes  
306 appearing on a single channel could be from one or more nearby neurons. This, however, does mean  
307 that it is possible to treat each individual probe channel as a single multi-unit, to facilitate investigation  
308 of the relationship between neuronal spiking activity and beta bursting. As shown in the left panel of  
309 (Fig. 6a), individual spike waveforms can be readily discerned, and these spike waveforms are similar  
310 in wild-type (black) and J20 (green) mice. Furthermore, there was a trend towards higher multi-unit  
311 firing rate in J20 mice compared to wild-type mice (WT:  $12.9 \text{ Hz} \pm 4.9$ ; J20:  $33.5 \text{ Hz} \pm 7.3$ ;  $t(12) = -2.18$ ,  
312  $p = 0.05$ ; unpaired t-test, Fig. 6a, right). The average beta amplitude during beta bursts is shown in  
313 (Fig. 6b), averaged across all bursts with non-overlapping time segments. Beta bursts in both  
314 genotypes are associated with a brief, monophasic increase in beta amplitude that lasts no more than  
315 200 ms on average. Finally, (Fig. 6c) shows peri-event time histograms for spike rate during beta  
316 bursts, as a Z score from the pre-burst baseline (left of the dotted line). In order to investigate  
317 statistically significant changes in spike rate during bursts, the maximum z scored spike rate was

318 determined at the peak of beta amplitude (approximately 100 ms after burst onset), for each animal,  
319 and compared to the mean pre-burst spike rate (0 due to z scoring of spike rate to baseline) using a  
320 one-sample t-test. Beta bursting in the RSCg of wild-type mice was associated with a significant  
321 increase in spike rate during beta bursts (Z-scored spike rate from baseline:  $2.24 \pm 0.46$ ,  $t(5) = 4.86$ ,  $p$   
322  $= 0.005$ , one-sample t-test; Figure 6c, left). Conversely there was no significant increase in spike rate  
323 during beta bursts in J20 mice (Z-scored spike rate from baseline:  $0.78 \pm 0.39$ ,  $t(7) = 1.98$ ,  $p = 0.09$ ,  
324 one-sample t-test; Figure 6c, right). The difference between spike rate during beta bursts in wild-type  
325 and J20 mice, as determined by a two-sample t-test, was significant ( $t(12) = 2.4$ ,  $p = 0.03$ , two-sample  
326 t-test). These data indicate that beta bursts are closely coupled to neuronal spiking in RSCg in wild-  
327 type mice, and that this relationship is effectively uncoupled in J20 mice.

## 328 **Discussion**

329 In this study we attempted to identify neurophysiological correlates of environmental novelty in the  
330 mouse retrosplenial cortex (RSC), and investigate how these may be affected by amyloid pathology.  
331 We observed phasic increases in the amplitude of beta frequency neuronal oscillations, termed beta  
332 bursts, which occurred more frequently and with larger amplitude during novelty, and were positively  
333 correlated with neuronal spiking. A number of aberrant neurophysiological changes were seen in the  
334 RSC in J20 mice. Alpha, beta and low gamma power were significantly increased, and increases in beta  
335 bursting activity were seen during both novelty and familiarity. Beta bursts were more frequent, and  
336 larger in magnitude, yet the coupling of beta bursts to spiking activity was lost, suggesting a functional  
337 uncoupling of beta bursting with local neuronal activity. Finally, theta-beta phase-amplitude coupling  
338 was also disrupted, resulting in a loss of an effect of novelty on this activity. These results together  
339 indicate that beta bursting activity is a neurophysiological correlate of environmental novelty in the  
340 RSC, which is disrupted in J20 mice.

341 Numerous studies have noted changes in beta activity in a range of brain regions, during a variety of  
342 behaviours (see Spitzer and Haegens, 2017 for review). It is important to note that due to variability

343 between groups in the naming and frequency ranges of neural oscillation frequency bands, cross-  
344 study comparison is often complicated. What we have referred to as beta, has previously been called  
345 upper beta (Spitzer and Haegens, 2017), beta2 (França et al., 2014), or slow gamma (Carr et al., 2012;  
346 Remondes and Wilson, 2015). For the sake of clarity, references to beta oscillations in this paper refer  
347 to the 20-30 Hz frequency range. Others have noticed similar novelty-induced beta oscillations in the  
348 hippocampus: Berke *et al.* (2008) reported a large increase in beta power that appeared when mice  
349 explored a novel environment, which persisted for around a minute, before returning to a lower level.  
350 The authors concluded that these oscillations may be a “dynamic state that facilitates the formation  
351 of unique contextual representations.” As shown in Igarashi *et al.* (2014), coherent 20-40 Hz oscillatory  
352 activity increased between the hippocampus and lateral entorhinal cortex during odour  
353 discrimination, and coincided with the development of odour-specific neural representations in these  
354 regions. Work by França *et al.* (2014) demonstrated that beta power was also transiently enhanced in  
355 the hippocampus during exploration of novel objects, but not previously experienced familiar items.  
356 Furthermore, they found that administration of an amnesic agent, namely haloperidol, resulted in a  
357 similar increased beta activity upon re-exposure to previously encountered objects, suggesting they  
358 had been “forgotten” and were therefore novel again. This further reinforces the idea that  
359 hippocampal beta activity is related to novelty, and extends the previous work by demonstrating that  
360 hippocampal-dependent novel object recognition can also elicit beta oscillations. Subsequently,  
361 França, Borgegius and Cohen (2020) investigated novelty-associated beta bursting in a larger  
362 hippocampal novelty circuit, by simultaneously recording from hippocampus, prefrontal cortex and  
363 parietal cortex during environmental and object novelty. Novelty-associated increases in beta power  
364 were seen in the prefrontal cortex during environmental novelty, and authors demonstrated  
365 significant phase-amplitude coupling of delta and theta to beta oscillations, which were increased in  
366 novelty. Similarly, in the RSC we see strong coupling between theta phase and beta amplitude, which  
367 is significantly higher during novelty, but only in wild-type mice. Others have noted theta-beta PAC in  
368 humans as well, both in the hippocampus during a working memory task (Axmacher et al., 2010), and



369 in the inferior temporal cortex during object novelty (Daume et al., 2017). Interestingly, the studies  
370 mentioned above tend to view beta activity as continuous oscillations, rather than discrete events.  
371 This is despite Berke *et al.* (2008) noting that beta appears as pulses, and a brief mention of burst  
372 detection and characterisation by França *et al.* (2014). As demonstrated in this study, novelty-  
373 associated beta oscillations in the RSC conform well to a model of discrete bursts, where their rate,  
374 magnitude and duration can vary depending on environmental novelty. Due to the use of averaging  
375 across trials or analysis spanning long temporal segments, the phasic nature of transient oscillatory  
376 events can be easily lost. Furthermore, in the somatosensory cortex, beta synchronicity appears in  
377 short events in both mice and humans; the features of which, such as duration and frequency range,  
378 are highly conserved across tasks and species (Shin et al., 2017).

379 Beta oscillations have long been associated with motor activity and sensory processing, and a large  
380 body of work has also noted changes in beta activity in a range of brain regions during other cognitive  
381 tasks (see Engel and Fries, 2010 for review). This gave rise to the hypothesis that the unifying function  
382 of beta oscillatory activity in these different regions was the maintenance of the “status-quo”, be it  
383 the current motor state, sensory stimulus or cognitive set (Engel and Fries, 2010). This theory would  
384 suggest that, beta activity would be decreased during novelty, and increased during familiarity. As we  
385 have shown, this is not the case. While steady and persistent beta bursting during familiarity may  
386 support the maintenance of the contextual “status-quo”, in this case the environment, this theory  
387 does not reconcile the significant increases in beta activity that occur during novelty.

388 Many groups have previously shown that information may be rapidly represented and stored in the  
389 RSC (Cowansage et al., 2014; Czajkowski et al., 2014; Koike et al., 2017; Vedder et al., 2017). Beta  
390 oscillations have also been shown to carry a variety of different forms of contextual information in a  
391 range of brain regions, and phasic increases in beta power during working memory maintenance may  
392 represent reactivation of encoded information (Spitzer and Haegens, 2017). Supporting this is a study  
393 in which the authors employed transcranial magnetic stimulation to activate a currently unattended

394 memory, as shown by an increase in content-specific beta activity (Rose et al., 2016). The theory put  
395 forth by Spitzer and Haegens (2017), is that beta oscillations can activate and reactivate neuronal  
396 ensembles to create and recall cortical representations. This theory is consistent with the data shown  
397 in this study: high beta bursting activity during perceived novelty activates neurons in the RSC, which  
398 may encode content about the novel environment, and subsequent beta bursting may continuously  
399 reactivate these ensembles, further consolidating or altering this representation. Recent  
400 breakthroughs in real-time burst detection and neurofeedback have made it possible to artificially  
401 induce beta bursts in awake behaving animals, creating the possibility of testing this hypothesis  
402 directly (Karvat et al., 2020).

403 A number of neurophysiological changes were seen in the RSC in J20 mice. Increases in alpha, beta  
404 and gamma power are indicative of a hyperexcitability phenotype, which has been previously noted  
405 in this strain (Palop et al., 2007; Palop and Mucke, 2009). Increases in beta bursting rate and burst  
406 magnitude were also notable. Finally, and most importantly, beta bursting activity was effectively  
407 uncoupled from neuronal spiking in J20 mice, potentially impairing the ability to form neuronal  
408 ensembles that encode and store information in the RSC. At the age point used, amyloid pathology in  
409 J20 mice is thought to be predominantly located in the hippocampus in this model, although, amyloid  
410 pathology seems to develop in the RSC to a much greater extent than other cortical regions, especially  
411 in RSCg (Whitesell et al., 2019). Hyperexcitability of cortical neurons in a mouse model of amyloid  
412 pathology was more prevalent in neurones proximal to amyloid plaques (Busche et al., 2008), and  
413 inhibitory interneuron dysfunction in J20 mice has been shown to lead to cortical network  
414 hypersynchrony and spontaneous epileptiform discharges (Verret et al., 2012). The hippocampus  
415 projects directly to RSCg, and indirectly, via the subiculum, to RSCdg (van Groen and Wyss, 1992; Van  
416 Groen and Wyss, 2003a, 2003b), so network dysfunction in RSC may be explained by its high levels of  
417 amyloid pathology or its anatomical connectivity with an increasingly dysfunctional hippocampus  
418 (Palop et al., 2007).

419 These findings demonstrate a novel form of Alzheimer's disease (AD) related cortical dysfunction,  
420 which may underlie or exacerbate cognitive dysfunction seen in these mice, and in people with AD.  
421 Erroneous attribution of novelty to familiar environments, could cause memory impairments, and  
422 result in wandering and confusion. Interestingly, aberrant beta bursting has long been associated with  
423 another progressive neurodegenerative disease, Parkinson's disease. Increased beta oscillatory  
424 activity in the basal ganglia and cortex are associated with motor impairments in Parkinson's disease  
425 (for review see Brittain, Sharott and Brown, 2014), and administration of levodopa has been shown to  
426 improve motor function and reduce beta oscillations (Brown et al., 2001). The loss of coupling  
427 between beta bursting and neuronal spiking seen in J20 mice suggest that attenuating bursting  
428 without restoring this coupling may be ineffective in AD. Furthermore, the dysfunction in novelty-  
429 associated beta bursting identified in this study may be a useful functional biomarker of AD-related  
430 amyloidopathy, which could be used to measure the neurophysiological effectiveness of possible  
431 disease modifying therapeutics.

432 In conclusion, phasic bursts of beta oscillations may be a functional means of activating neural  
433 ensembles to form, and subsequently reactivate cortical representations. Network dysfunction in J20  
434 mice results in aberrant beta bursting and an uncoupling of beta bursting from spiking, which may  
435 underlie cognitive impairments in these mice.

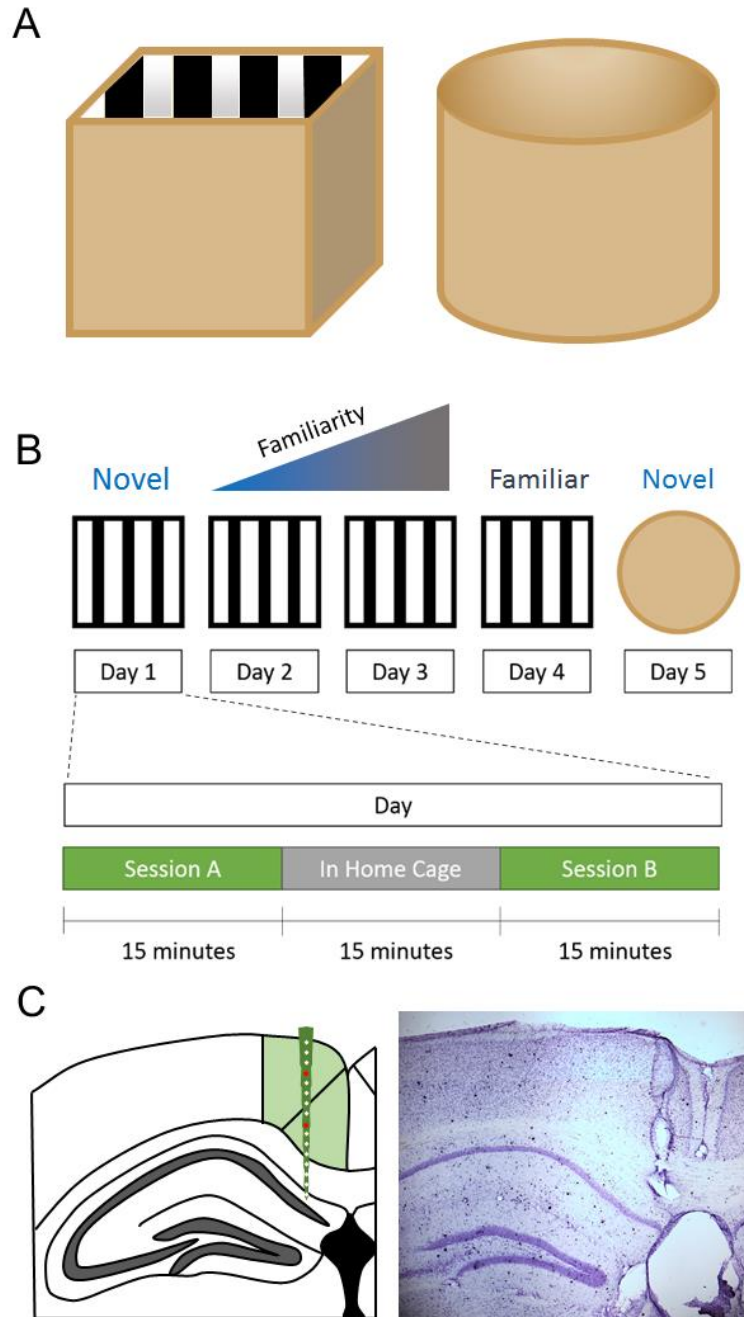

Figure 1. Experimental Design A. Diagrams of the recording arenas used for this study. Both are roughly equal sized, one is square, with black and white stripes along the walls and floor (left) and the other is cylindrical with plain brown floor and walls. B. Experimental procedure for the novel/familiar environment task. A mouse is placed in one of the recording arenas for two 15 minute sessions, referred to as sessions A and B, with a 15 minute break in their home cage between the two sessions. This is repeated in the same arena for 4 consecutive days, after which the arena is switched for the 5<sup>th</sup> and final day. C. Single shank, 16 channel silicon probe electrodes were implanted in the retrosplenial cortex (green), so that they spanned the dysgranular (upper green section) and granular (lower green section) subregions. In order to verify the location of the electrodes, electrolytic lesions were made prior to perfusion, and slices were histologically prepared using Cresyl Violet stain. An example is shown (right).

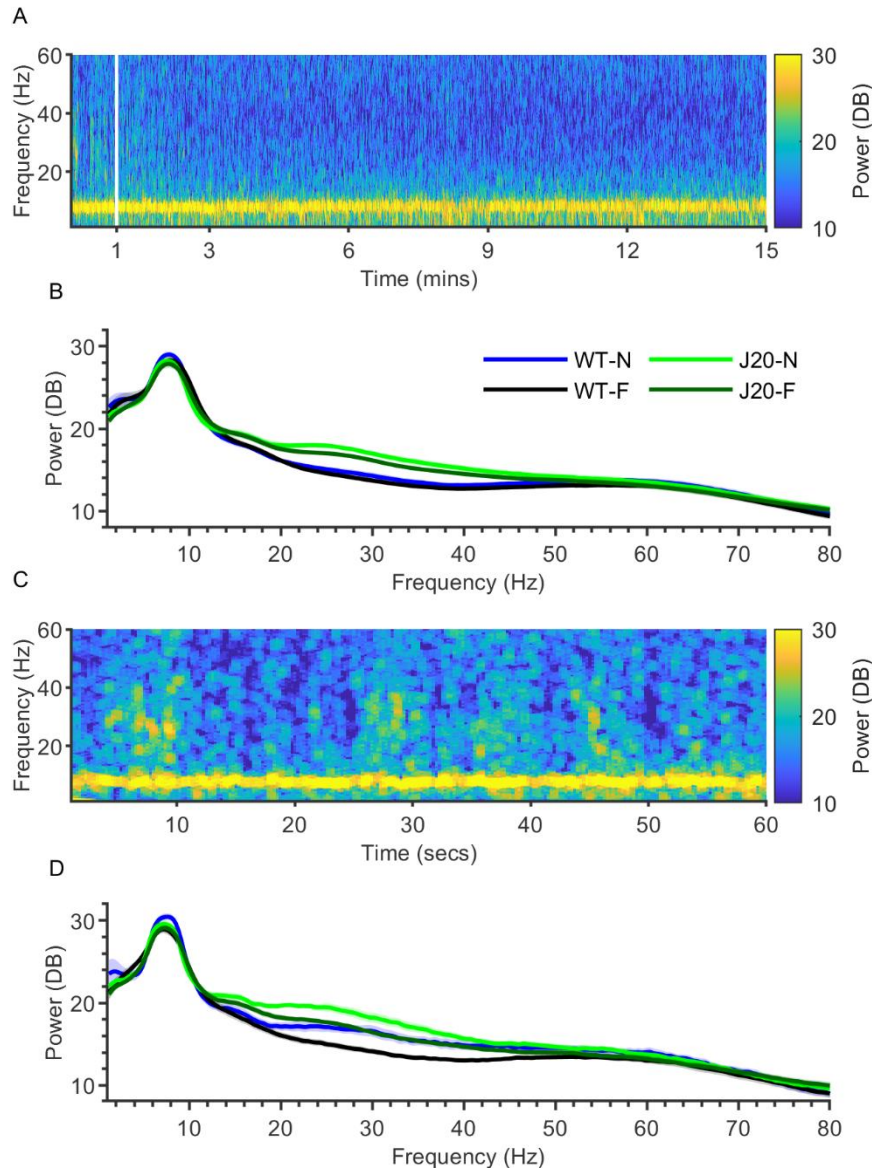

Figure 2. Beta (20-30 Hz) power is significantly higher during novelty in the granular retrosplenial cortex in wild-type and J20 mice. A. Example power spectrogram for an entire novel session in a wild-type mouse. B. Average power spectra for the entire 15 minutes of all novel and familiar sessions, for wild-type and J20 mice. Beta power was significantly higher during novelty in J20 ( $p = 4.7e-4$ ) but not wild-type mice. When compared to WT power in the alpha, beta, low gamma and high gamma bands were significantly higher overall in J20 mice ( $p = 8.46e-6$ ,  $p = 1.01e-32$ ,  $p = 9.56e-10$ ,  $2.3e-4$  respectively), whereas power in the delta and theta band were significantly lower ( $p = 0.03$ ,  $p = 0.006$  respectively). C. Example power spectrogram shown in A, expanded to show the first 60 seconds of the session. Short epochs of increased power in the 20-40 Hz range can be seen. D. Average power spectra for the first minute of all novel and familiar sessions, for wild-type and J20 mice. Beta and low-gamma power were significantly higher during novelty, for both wild-type ( $p = 5.47e-8$ ,  $p = 3.62e-5$  respectively) and J20 mice ( $p = 3.59e-8$ ,  $p = 0.002$  respectively). Alpha, beta, low gamma and high gamma power were significantly higher overall in J20 mice ( $p = 2.47e-9$ ,  $p = 1.1e-21$ ,  $p = 2.52e-4$ ,  $p = 4.65e-4$  respectively). (Data shown as mean  $\pm$  SEM, WT:  $n = 6$ , J20:  $n = 8$ ).

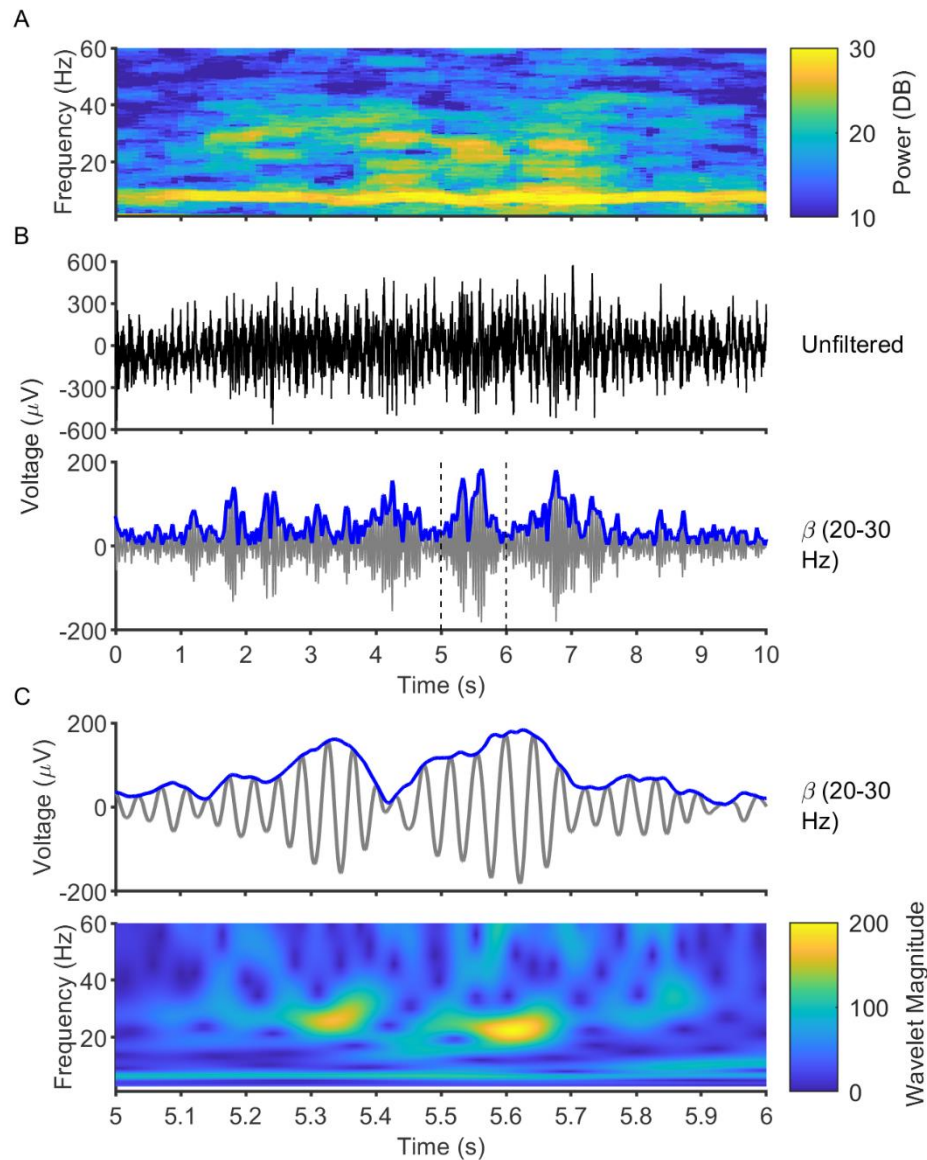

Figure 3. Retrosplenial local field potentials are marked by short, phasic increases in beta power, referred to as beta bursts. A. Example power spectrogram showing transient increases in beta power. B. Local field potentials of data shown in A, both unfiltered (top), and filtered in the beta band (bottom), with the envelope amplitude in blue for clarity. The beta-filtered local field potential shows clear epochs of high beta amplitude, which intersperse a low amplitude continuous beta oscillation. C. Expanded trace of the dashed area in shown in B (top), and a continuous wavelet spectrogram of this time series (bottom). Due to the high temporal resolution of wavelet-based methods, these periods of high beta amplitude can be seen to be brief in duration, only lasting around 100-200ms.



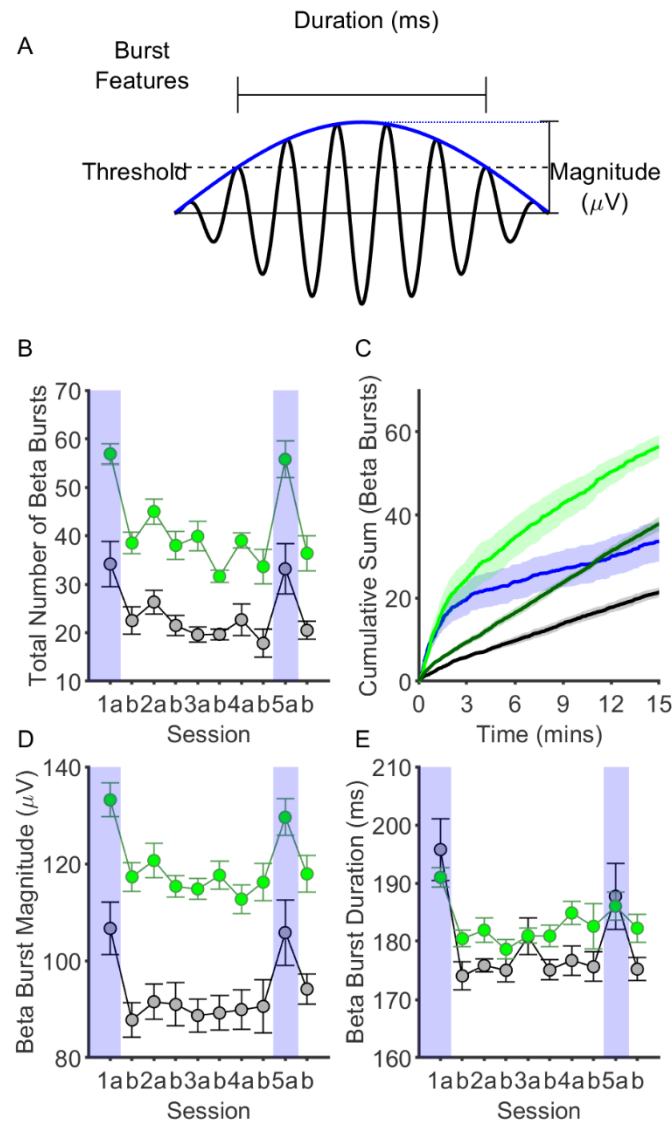

Figure 4. Beta bursting activity in the granular retrosplenial cortex (RSCg) is highly associated with novelty, and dysregulated in J20 mice. A. Diagram illustrating how beta bursts were detected, as well as how the magnitude and duration of these events were calculated. B. Graph showing the average number of beta bursts detected in RSCg in each session, for wild-type (black) and J20 mice (green). Novel sessions Day1a and Day5a are highlighted in blue for clarity. There were significantly more beta bursts in novel sessions as compared to familiar sessions, for both wild-type ( $p = 7.59e-5$ ) and J20 mice ( $p = 4.83e-12$ ). C. Cumulative frequency graphs of number of bursts detected in novel and familiar sessions, for wild-type and J20 mice, showing the time course of bursting activity within sessions. While beta bursting occurred monotonically during familiar sessions, during the first 2-3 minutes of a novel session, beta bursting was substantially increased. D. Graph showing the average magnitude of beta bursts in RSCg in each session, for wild-type and J20 mice. Beta bursts were significantly larger in magnitude in novel sessions, for wild-type ( $p = 2.88e-5$ ) and J20 mice ( $p = 5.16e-6$ ). Beta bursts were also, on average, significantly larger in magnitude in J20 mice ( $p = 2.97e-22$ ). E. Graph showing the average duration of beta bursts in RSCg in each session, for wild-type and J20 mice. Beta bursts were significantly longer in duration in novel sessions, for wild-type ( $p = 3.32e-9$ ) and J20 mice ( $p = 0.005$ ). (Data shown as mean  $\pm$  SEM, WT:  $n = 6$ , J20:  $n = 8$ ).

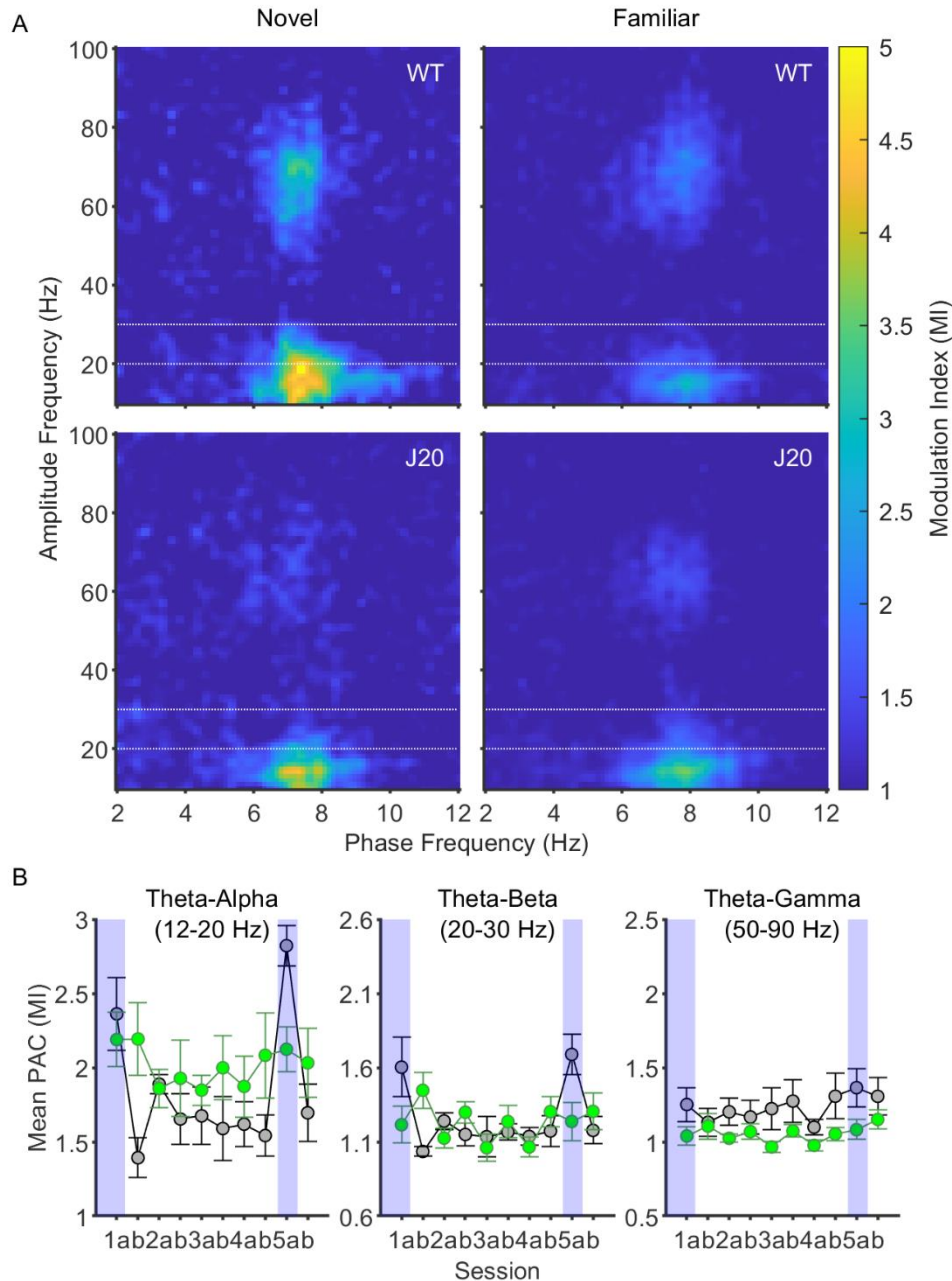

Figure 5. Theta-alpha and theta-beta phase-amplitude coupling are increased during novelty in the granular retrosplenial cortex (RSCg). **A**. Average comodulograms showing the strength of cross-frequency phase-amplitude coupling in RSCg during the first minute of novel and familiar sessions, for wild-type and J20 mice. Note the presence of three peaks in the first comodulogram, in the theta-alpha, theta-beta and theta-gamma ranges (the boundaries of which are denoted by the dotted lines). **B**. Average MI in the theta-alpha (left), theta-beta (center) and theta-gamma ranges (right), for each session, for wild-type (black) and J20 mice (green). Novel sessions Day1a and Day5a are highlighted in blue for clarity. Theta-alpha and theta-beta coupling were significantly higher in novel sessions for wild-type mice ( $p = 2.4e-7$ ,  $p = 1.04e-6$  respectively), but not J20 mice. (Data shown as mean  $\pm$  SEM, WT:  $n = 6$ , J20:  $n = 8$ ).



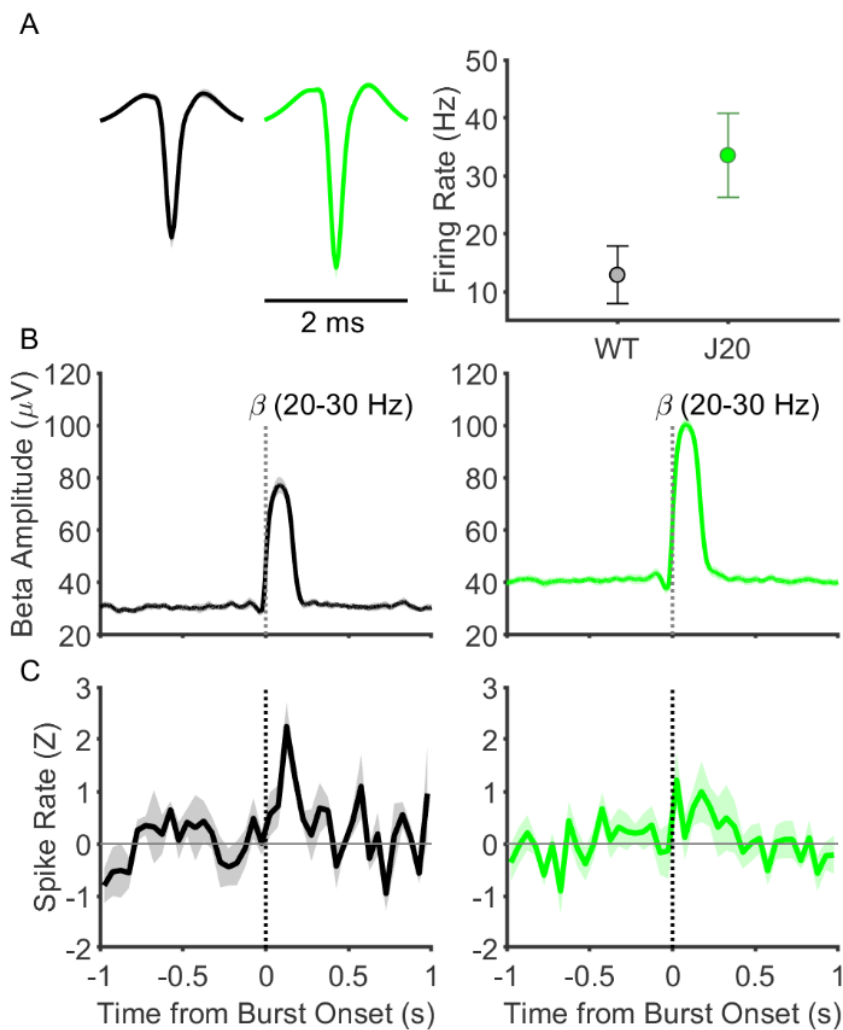

Figure 6. Spiking activity in RSCg is coupled to beta bursting in wild-type mice, but disrupted in J20 mice. A. Average spike waveforms for multi-unit activity in wild-type (black) and J20 (green) mice (left) and graph of average firing rate for detected multi-units across all sessions (right). There was a trend towards increased multi-unit firing rate in J20 mice compared to wild-type mice ( $p = 0.052$ , unpaired t-test). B. Graphs showing beta amplitude over time for beta bursts, time locked to the onset of the burst (dotted line), and averaged across all detected bursts, for wild-type mice (left) and J20 mice (right). Beta bursting was associated with a monophasic increase in beta amplitude that returns to baseline after around 250 ms. C. Peri-event histograms showing multi-unit activity spike rate during beta bursts, for wild-type (left) and J20 mice (right). Data is shown as Z score from baseline (pre-burst epoch), and averaged across all beta bursts with non-overlapping time segments. Dotted vertical line denotes the burst onset, while the solid horizontal line is shown to indicate the baseline of zero. Spike rate significantly increased during bursts in wild-type mice ( $p = 0.005$ ), but not in J20 mice ( $p = 0.09$ ).

## 436 **References**

- 437 Axmacher N, Henseler MM, Jensen O, Weinreich I, Elger CE, Fell J (2010) Cross-frequency coupling  
438 supports multi-item working memory in the human hippocampus. *Proc Natl Acad Sci*  
439 107:3228–3233.
- 440 Berke JD, Hetrick V, Breck J, Greene RW (2008) Transient 23–30 Hz oscillations in mouse  
441 hippocampus during exploration of novel environments. *Hippocampus* 18:519–529.
- 442 Brittain JS, Sharott A, Brown P (2014) The highs and lows of beta activity in cortico-basal ganglia  
443 loops. *Eur J Neurosci* 39:1951–1959.
- 444 Brown P, Oliviero A, Mazzone P, Insola A, Tonali P, Di Lazzaro V (2001) Dopamine dependency of  
445 oscillations between subthalamic nucleus and pallidum in Parkinson’s disease. *J Neurosci*  
446 21:1033–1038.
- 447 Busche MA, Eichhoff G, Adelsberger H, Abramowski D, Wiederhold KH, Haass C, Staufenbiel M,  
448 Konnerth A, Garaschuk O (2008) Clusters of hyperactive neurons near amyloid plaques in a  
449 mouse model of Alzheimer’s disease. *Science (80- )* 321:1686–1689.
- 450 Canolty RT, Edwards E, Dalal SS, Soltani M, Nagarajan SS, Kirsch HE, Berger MS, Barbare NM, Knight  
451 RT (2006) High gamma power is phase-locked to theta oscillations in human neocortex. *Science*  
452 (80- ) 313:1626–1628.
- 453 Canolty RT, Ganguly K, Kennerley SW, Cadieu CF, Koepsell K, Wallis JD, Carmena JM (2010)  
454 Oscillatory phase coupling coordinates anatomically dispersed functional cell assemblies. *Proc*  
455 *Natl Acad Sci U S A* 107:17356–17361.
- 456 Carr MF, Karlsson MP, Frank LM (2012) Transient Slow Gamma Synchrony Underlies Hippocampal  
457 Memory Replay. *Neuron* 75:700–713.
- 458 Cheng IH, Scarce-Levie K, Legleiter J, Palop JJ, Gerstein H, Bien-Ly N, Puoliväli J, Lesné S, Ashe KH,

- 459 Muchowski PJ, Mucke L (2007) Accelerating amyloid- $\beta$  fibrillization reduces oligomer levels and  
460 functional deficits in Alzheimer disease mouse models. *J Biol Chem* 282:23818–23828.
- 461 Choo IH, Lee DY, Oh JS, Lee JS, Lee DS, Song IC, Youn JC, Kim SG, Kim KW, Jhoo JH, Woo JI (2010)  
462 Posterior cingulate cortex atrophy and regional cingulum disruption in mild cognitive  
463 impairment and Alzheimer’s disease. *Neurobiol Aging* 31:772–779.
- 464 Cowansage KK, Shuman T, Dillingham BC, Chang A, Golshani P, Mayford M (2014) Direct Reactivation  
465 of a Coherent Neocortical Memory of Context. *Neuron* 84:432–441.
- 466 Czajkowski R, Jayaprakash B, Wiltgen B, Rogerson T, Guzman-Karlsson MC, Barth AL, Trachtenberg  
467 JT, Silva AJ (2014) Encoding and storage of spatial information in the retrosplenial cortex. *Proc*  
468 *Natl Acad Sci* 111:8661–8666.
- 469 Daume J, Gruber T, Engel AK, Fries U (2017) Phase-amplitude coupling and long-range phase  
470 synchronization reveal frontotemporal interactions during visual working memory. *J Neurosci*  
471 37:313–322.
- 472 De Sousa AF, Cowansage KK, Zutshi I, Cardozo LM, Yoo EJ, Leutgeb S, Mayford M (2019) Optogenetic  
473 reactivation of memory ensembles in the retrosplenial cortex induces systems consolidation.  
474 *Proc Natl Acad Sci U S A* 116:8576–8581.
- 475 Engel AK, Fries P (2010) Beta-band oscillations-signalling the status quo? *Curr Opin Neurobiol*  
476 20:156–165.
- 477 França ASC, Borgegius N, Cohen MX (2020) Beta2 oscillations in the hippocampal-cortical novelty  
478 detection circuit. Cold Spring Harbor Laboratory.
- 479 França ASC, do Nascimento GC, Lopes-dos-Santos V, Muratori L, Ribeiro S, Lobão-Soares B, Tort ABL  
480 (2014) Beta2 oscillations (23-30 Hz) in the mouse hippocampus during novel object recognition.  
481 *Eur J Neurosci* 40:3693–3703.

- 482 Iaria G, Chen JK, Guariglia C, Ptito A, Petrides M (2007) Retrosplenial and hippocampal brain regions  
483 in human navigation: Complementary functional contributions to the formation and use of  
484 cognitive maps. *Eur J Neurosci* 25:890–899.
- 485 Igarashi KM, Lu L, Colgin LL, Moser MB, Moser EI (2014) Coordination of entorhinal-hippocampal  
486 ensemble activity during associative learning. *Nature* 510:143–147.
- 487 Karvat G, Schneider A, Alyahyay M, Steenbergen F, Tangermann M, Diester I (2020) Real-time  
488 detection of neural oscillation bursts allows behaviourally relevant neurofeedback. *Commun*  
489 *Biol* 3.
- 490 Koike BDV, Farias KS, Billwiller F, Almeida-Filho D, Libourel PA, Tiran-Cappello A, Parmentier R,  
491 Blanco W, Ribeiro S, Luppi PH, Queiroz CM (2017) Electrophysiological evidence that the  
492 retrosplenial cortex displays a strong and specific activation phased with hippocampal theta  
493 during paradoxical (REM) sleep. *J Neurosci* 37:8003–8013.
- 494 Kwapis JL, Jarome TJ, Lee JL, Helmstetter FJ (2015) The retrosplenial cortex is involved in the  
495 formation of memory for context and trace fear conditioning. *Neurobiol Learn Mem* 123:110–  
496 116.
- 497 Laczó J, Vlček K, Vyhnálek M, Vajnerová O, Ort M, Holmerová I, Tolar M, Andel R, Bojar M, Hort J  
498 (2009) Spatial navigation testing discriminates two types of amnesic mild cognitive  
499 impairment. *202:252–259*.
- 500 Minoshima S, Giordani B, Berent S, Frey KA, Foster NL, Kuhl DE (1997) Metabolic reduction in the  
501 posterior cingulate cortex in very early Alzheimer’s disease. *Ann Neurol* 42:85–94.
- 502 Mitchell AS, Czajkowski R, Zhang N, Jeffery K, Nelson AJD (2018) Retrosplenial cortex and its role in  
503 spatial cognition. *Brain Neurosci Adv* 2:239821281875709.
- 504 Mitra P, Bokil H (2008) *Observed Brain Dynamics*.

- 505 Morganti F, Stefanini S, Riva G (2013) From allo- to egocentric spatial ability in early Alzheimer's  
506 disease: A study with virtual reality spatial tasks. *Cogn Neurosci* 4:171–180.
- 507 Palop JJ, Chin J, Roberson ED, Wang J, Thwin MT, Bien-Ly N, Yoo J, Ho KO, Yu GQ, Kreitzer A,  
508 Finkbeiner S, Noebels JL, Mucke L (2007) Aberrant Excitatory Neuronal Activity and  
509 Compensatory Remodeling of Inhibitory Hippocampal Circuits in Mouse Models of Alzheimer's  
510 Disease. *Neuron* 55:697–711.
- 511 Palop JJ, Mucke L (2009) Epilepsy and cognitive impairments in alzheimer disease. *Arch Neurol*  
512 66:435–440.
- 513 Quiroga RQ, Nadasdy Z, Ben-Shaul Y (2004) Unsupervised spike detection and sorting with wavelets  
514 and superparamagnetic clustering. *Neural Comput* 16:1661–1687.
- 515 Remondes M, Wilson MA (2015) Slow- $\gamma$  Rhythms Coordinate Cingulate Cortical Responses to  
516 Hippocampal Sharp-Wave Ripples during Wakefulness. *Cell Rep* 13:1327–1335.
- 517 Rose NS, LaRocque JJ, Riggall AC, Gosseries O, Starrett MJ, Meyering EE, Postle BR (2016)  
518 Reactivation of latent working memories with transcranial magnetic stimulation. *Science* (80- )  
519 354:1136–1139.
- 520 Shin H, Law R, Tsutsui S, Moore CI, Jones SR (2017) The rate of transient beta frequency events  
521 predicts behavior across tasks and species. *Elife* 6.
- 522 Spitzer B, Haegens S (2017) Beyond the status quo: A role for beta oscillations in endogenous  
523 content (RE)activation. *eNeuro* 4.
- 524 Todd TP, Bucci DJ (2015) Retrosplenial Cortex and Long-Term Memory: Molecules to Behavior.  
525 *Neural Plast* 2015.
- 526 van Ede F, Quinn AJ, Woolrich MW, Nobre AC (2018) Neural Oscillations: Sustained Rhythms or  
527 Transient Burst-Events? *Trends Neurosci* 41:415–417.

- 528 van Groen T, Wyss JM (1992) Connections of the retrosplenial dysgranular cortex in the rat. *J Comp*  
529 *Neurol* 315:200–216.
- 530 Van Groen T, Wyss JM (2003a) Connections of the retrosplenial granular b cortex in the rat. *J Comp*  
531 *Neurol* 463:249–263.
- 532 Van Groen T, Wyss JM (2003b) Connections of the retrosplenial granular b cortex in the rat. *J Comp*  
533 *Neurol* 463:249–263.
- 534 Vann SD, Aggleton JP, Maguire EA (2009) What does the retrosplenial cortex do? *Nat Rev Neurosci*  
535 10:792–802.
- 536 Vedder LC, Miller AMP, Harrison MB, Smith DM (2017) Retrosplenial Cortical Neurons Encode  
537 Navigational Cues, Trajectories and Reward Locations during Goal Directed Navigation. *Cereb*  
538 *Cortex* 27:3713–3723.
- 539 Verret L, Mann EO, Hang GB, Barth AMI, Cobos I, Ho K, Devidze N, Masliah E, Kreitzer AC, Mody I,  
540 Mucke L, Palop JJ (2012) Inhibitory interneuron deficit links altered network activity and  
541 cognitive dysfunction in alzheimer model. *Cell* 149:708–721.
- 542 Walsh C, Drinkenburg WHIM, Ahnaou A (2017) Neurophysiological assessment of neural network  
543 plasticity and connectivity: Progress towards early functional biomarkers for disease  
544 interception therapies in Alzheimer’s disease. *Neurosci Biobehav Rev* 73.
- 545 Whitesell JD, Buckley AR, Knox JE, Kuan L, Graddis N, Pelos A, Mukora A, Wakeman W, Bohn P, Ho A,  
546 Hirokawa KE, Harris JA (2019) Whole brain imaging reveals distinct spatial patterns of amyloid  
547 beta deposition in three mouse models of Alzheimer’s disease. *J Comp Neurol* 527:2122–2145.
- 548
